# Supplementary material for: Determinants for Simultaneous Binding of Copper and Platinum to Human Chaperone Atox1: Hitchhiking not Hijacking
Source: PubMed Central journal article supplement (PMC3728025; doi:10.1371/journal.pone.0070473), 2013-07-30

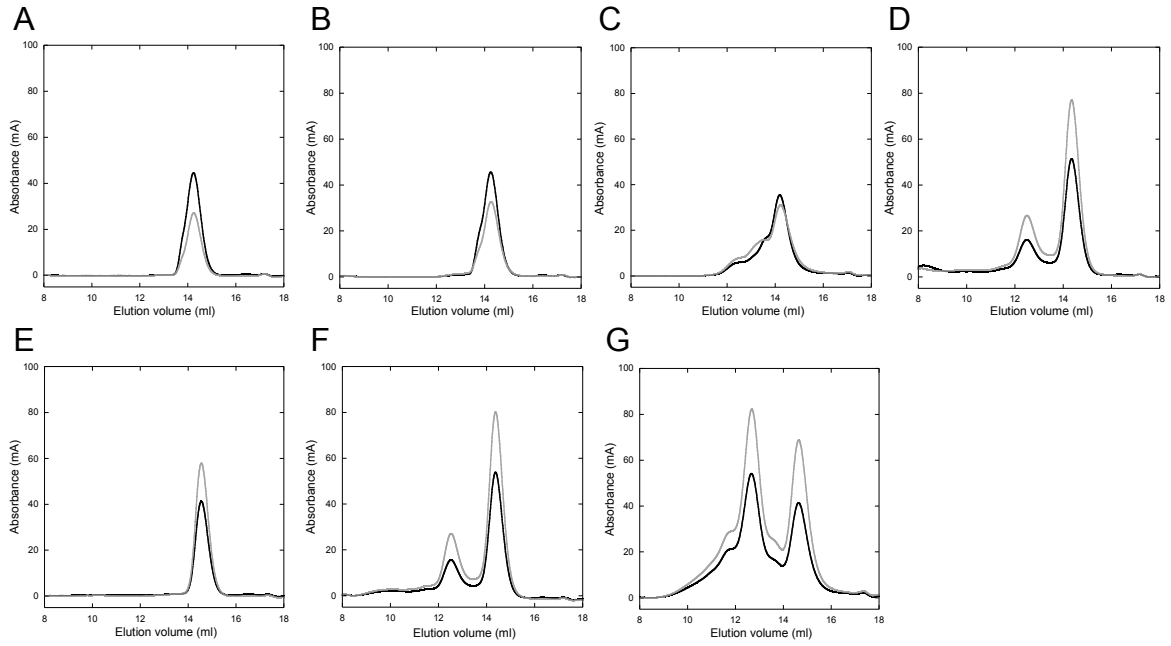

Supplement: pone.0070473.s003.pdf [file pone.0070473.s003.pdf]
