# Supplementary material for: Determinants for Simultaneous Binding of Copper and Platinum to Human Chaperone Atox1: Hitchhiking not Hijacking
Source: PubMed Central journal article supplement (PMC3728025; doi:10.1371/journal.pone.0070473), 2013-07-30

**A**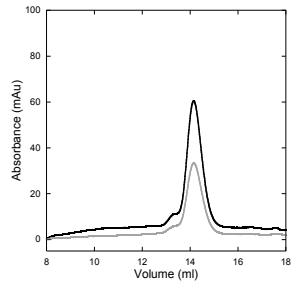**B**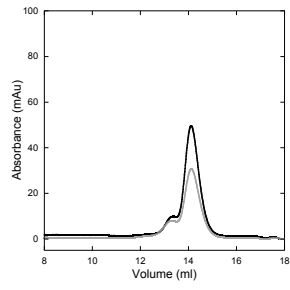**C**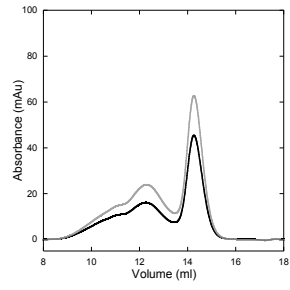**D**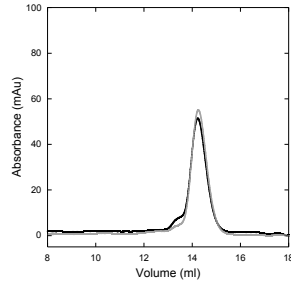**E**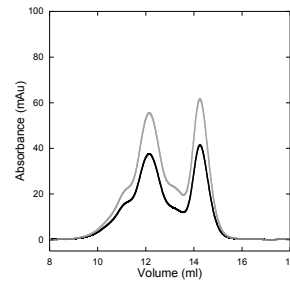

Supplement: pone.0070473.s007.pdf [file pone.0070473.s007.pdf]
